# Supplementary material for: Assignment of photoelectron spectra of silatranes: first ionization energies and the nature of the dative Si←N contact
Source: Royal Society of Chemistry journal article supplement (doi:10.1039/c5cp04341g), 2015-01-01
Supplement: c5cp04341g1.pdf [file c5cp04341g1.pdf]

## Electronic supplementary information

### **Assignment of photoelectron spectra of silatranes: first ionization energies and the nature of the dative Si←N contact**

Valery F. Sidorkin,\* Elena F. Belogolova and Evgeniya P. Doronina

*A. E. Favorsky Irkutsk Institute of Chemistry, Siberian Branch of the Russian Academy of Sciences  
Favorsky, 1, Irkutsk 664033, Russian Federation*

*E-mail: [syf@irioch.irk.ru](mailto:syf@irioch.irk.ru)*

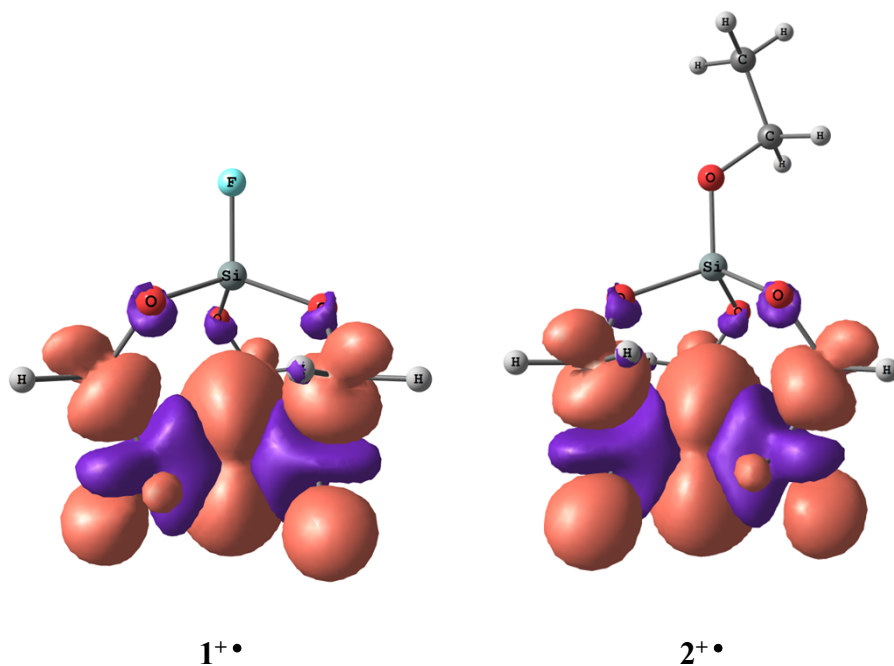

**Fig. S1** CCSD(full)/6-31G(d)//CCSD(fc)/6-31G(d) spin density distribution at 0.0008 au contour level in the radical cations of fluorosilatrane (a) and ethoxysilatrane (b)

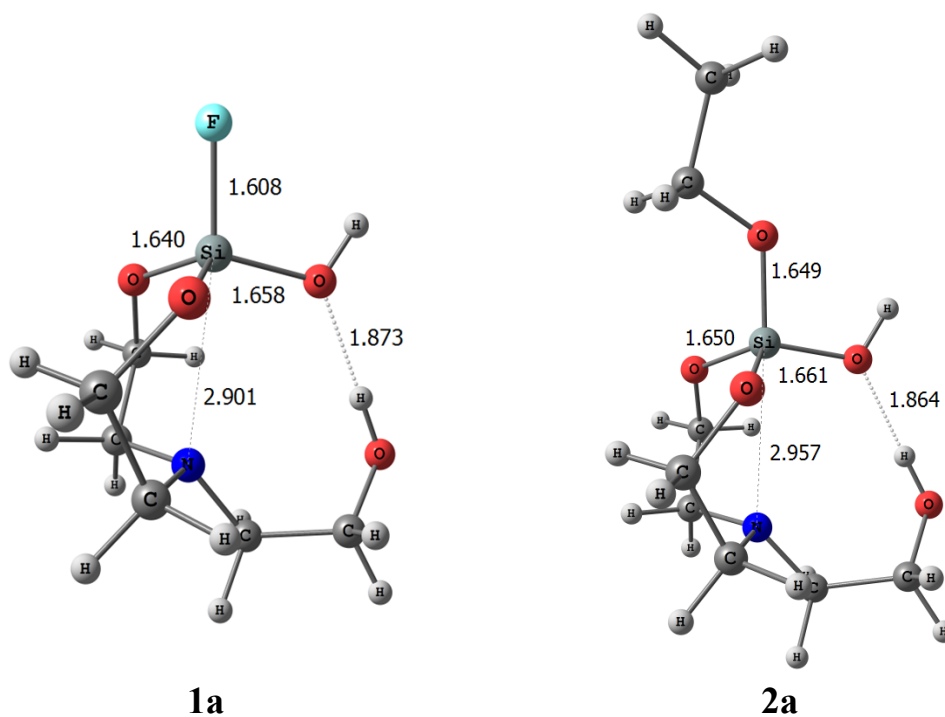

**Fig. S2** CCSD/6-31G(d) optimized geometries (in Å) of the hydrolysis products of fluorosilatrane (1a) and ethoxysilatrane (2a).

**Table S1.** Vertical ionization energies ( $E_i$ , eV) and spectroscopic factors ( $P$ ) for F-silatrane<sup>a</sup>

| MO  | HF    | OVGF  |      |
|-----|-------|-------|------|
|     | $E_i$ | $E_i$ | $P$  |
| 21a | 11.32 | 9.81  | 0.91 |
| 20a | 12.27 | 10.62 | 0.91 |
| 15e | 12.22 | 10.75 | 0.91 |
| 14e | 13.04 | 11.63 | 0.91 |
| 19a | 13.93 | 12.42 | 0.91 |
| 13e | 14.57 | 13.16 | 0.91 |
| 18a | 14.94 | 13.64 | 0.91 |
| 12e | 15.69 | 14.13 | 0.91 |
| 17a | 16.29 | 14.89 | 0.91 |
| 11e | 16.46 | 14.90 | 0.91 |
| 10e | 17.19 | 15.35 | 0.90 |
| 16a | 17.56 | 15.86 | 0.91 |
| 9e  | 18.27 | 16.54 | 0.91 |
| 15a | 18.93 | 17.06 | 0.90 |
| 8e  | 19.20 | 17.47 | 0.90 |
| 14a | 20.33 | 18.16 | 0.90 |

<sup>a</sup> Basis set 6-311G(d,p) results at CCSD/6-311G(d,p) geometry.**Table S2.** Vertical ionization energies ( $E_i$ , eV) and spectroscopic factors ( $P$ ) for EtO-silatrane<sup>a</sup>

| MO  | HF    | OVGF  |      |
|-----|-------|-------|------|
|     | $E_i$ | $E_i$ | $P$  |
| 59a | 10.67 | 9.17  | 0.90 |
| 58a | 11.20 | 9.90  | 0.91 |
| 57a | 11.82 | 10.43 | 0.91 |
| 56a | 11.99 | 10.53 | 0.91 |
| 55a | 12.01 | 10.57 | 0.91 |
| 54a | 12.17 | 10.67 | 0.91 |
| 53a | 12.78 | 11.38 | 0.91 |
| 52a | 12.84 | 11.45 | 0.91 |
| 51a | 13.61 | 12.57 | 0.91 |
| 50a | 13.74 | 12.40 | 0.91 |
| 49a | 13.85 | 12.82 | 0.91 |
| 48a | 14.26 | 12.91 | 0.91 |
| 47a | 14.43 | 13.04 | 0.91 |
| 46a | 14.65 | 13.38 | 0.91 |
| 45a | 14.83 | 13.43 | 0.90 |
| 44a | 15.82 | 14.47 | 0.91 |
| 43a | 15.91 | 14.53 | 0.91 |
| 42a | 16.12 | 14.80 | 0.91 |
| 41a | 16.74 | 15.30 | 0.90 |
| 40a | 16.86 | 15.14 | 0.90 |
| 39a | 16.89 | 15.25 | 0.90 |
| 38a | 17.29 | 15.82 | 0.90 |
| 37a | 17.87 | 16.34 | 0.90 |
| 36a | 17.97 | 16.41 | 0.90 |
| 35a | 18.58 | 16.89 | 0.90 |
| 34a | 18.89 | 17.30 | 0.90 |
| 33a | 18.91 | 17.31 | 0.90 |
| 32a | 19.84 | 17.85 | 0.89 |

<sup>a</sup> Basis set 6-311G(d,p) results at CCSD/6-311G(d,p) geometry.

**Table S3.** Effect of the scaling factor  $x$  (LVC formalism) on the ROVGF/6-311G(d,p) linear vibronic coupling constants,  $\kappa \times 10$  (eV), and the corresponding vibrational width,  $\Delta$  (eV), by the example of the ionization transition 21a of F-silatrane<sup>a</sup>

| $\nu_n$  | $\omega$ | $x = 1.0$ | $x = 0.5$ | $x = 0.1$ |
|----------|----------|-----------|-----------|-----------|
| 1        | 85       | 1.18      | 1.20      | 1.21      |
| 4        | 227      | -2.12     | -2.16     | -2.17     |
| 7        | 297      | -0.26     | -0.26     | -0.26     |
| 14       | 475      | 0.81      | 0.81      | 0.81      |
| 15       | 580      | 0.58      | 0.58      | 0.58      |
| 18       | 622      | -0.14     | -0.14     | -0.14     |
| 19       | 763      | 0.11      | 0.11      | 0.11      |
| 22       | 888      | -0.99     | -0.99     | -0.99     |
| 25       | 919      | -0.57     | -0.57     | -0.57     |
| 28       | 1028     | 0.85      | 0.85      | 0.85      |
| 31       | 1097     | 0.59      | 0.59      | 0.59      |
| 34       | 1185     | 0.22      | 0.22      | 0.23      |
| 37       | 1260     | -0.29     | -0.29     | -0.29     |
| 40       | 1291     | -0.50     | -0.50     | -0.50     |
| 45       | 1386     | 0.57      | 0.57      | 0.58      |
| 46       | 1397     | 0.05      | 0.06      | 0.06      |
| 51       | 1488     | -0.59     | -0.59     | -0.59     |
| 54       | 1520     | 0.36      | 0.36      | 0.36      |
| 55       | 3006     | 0.16      | 0.16      | 0.16      |
| 60       | 3030     | -0.06     | -0.06     | -0.06     |
| 63       | 3083     | 0.05      | 0.05      | 0.05      |
| 64       | 3101     | -0.13     | -0.13     | -0.13     |
| $\Delta$ |          | 0.77      | 0.78      | 0.78      |

<sup>a</sup> The coupling constants  $\kappa$  were evaluated with respect to the totally symmetric normal modes,  $\nu_n$ , with frequencies,  $\omega$  (cm<sup>-1</sup>).

**Table S4.** Selected CCSD/6-31G(d) and CCSD/6-311G(d,p) (bold) geometrical parameters of the neutral molecules and radical cations of fluoro- and ethoxy-silatrane<sup>a</sup>

|          | X = F              |              |       |              | X = OEt |              |       |  |
|----------|--------------------|--------------|-------|--------------|---------|--------------|-------|--|
|          | Neutr <sup>b</sup> |              | RC    |              | Neutr   |              | RC    |  |
| Si-N     | 2.322              | <b>2.324</b> | 3.039 | <b>3.049</b> | 2.426   | <b>2.441</b> | 3.084 |  |
| Si-O     | 1.672              | <b>1.661</b> | 1.652 | <b>1.642</b> | 1.674   | <b>1.664</b> | 1.668 |  |
| O-C      | 1.415              | <b>1.407</b> | 1.416 | <b>1.408</b> | 1.415   | <b>1.408</b> | 1.412 |  |
| C-N      | 1.468              | <b>1.466</b> | 1.464 | <b>1.462</b> | 1.463   | <b>1.460</b> | 1.462 |  |
| XSiO     | 99.4               | <b>99.5</b>  | 110.9 | <b>110.9</b> | 101.6   | <b>101.9</b> | 113.3 |  |
| OCC      | 108.6              | <b>108.6</b> | 110.6 | <b>111.0</b> | 109.0   | <b>109.1</b> | 111.2 |  |
| CNC      | 115.2              | <b>115.2</b> | 120.0 | <b>120.0</b> | 116.0   | <b>116.2</b> | 120.0 |  |
| CNSi     | 102.9              | <b>102.8</b> | 89.2  | <b>88.9</b>  | 101.8   | <b>101.4</b> | 88.8  |  |
| $\eta_e$ | 75                 | <b>75</b>    | 0     | 0            | 62      | <b>61</b>    | 0     |  |

<sup>a</sup> Bond lengths are in angstroms, angles are in degrees. For EtO-silatrane the geometric parameters are averaged for three chains. <sup>b</sup> Our data (see: E. F. Belogolova and V. F. Sidorkin, *J. Phys. Chem. A*, 2013, **117**, 5365–5376).

**Table S5.** Mulliken populations in the selected MO's of F-Silatrane<sup>a</sup>

| Atom                             | 21a  | 15e  | 20a  | 14e  | 19a  | 13e  | 18a  | 12e  | 15a  |
|----------------------------------|------|------|------|------|------|------|------|------|------|
| N                                | 1.03 | 0.03 | 0.16 | 0.01 | 0.03 | 0.27 | 0.01 | 0.04 | 0.18 |
| Si                               | 0.07 | 0.06 | 0.00 | 0.09 | 0.12 | 0.02 | 0.00 | 0.06 | 0.11 |
| O                                | 0.07 | 0.33 | 0.44 | 0.31 | 0.32 | 0.14 | 0.08 | 0.18 | 0.09 |
| C <sub><math>\beta</math></sub>  | 0.06 | 0.10 | 0.05 | 0.12 | 0.11 | 0.05 | 0.06 | 0.09 | 0.15 |
| C <sub><math>\alpha</math></sub> | 0.07 | 0.09 | 0.03 | 0.06 | 0.10 | 0.21 | 0.25 | 0.04 | 0.09 |
| F                                | 0.01 | 0.02 | 0.01 | 0.01 | 0.00 | 0.09 | 0.01 | 0.80 | 0.43 |

<sup>a</sup> HF calculations using the 6-311G(d,p) basis set for the CCSD/6-311G(d,p) molecular geometry. Units are electrons; the sum over all atoms is 2.

**Table S6** Mulliken populations in the selected MO's of EtO-Silatrane<sup>a</sup>

|                                  | 59a  | 58a  | 57a  | 56a  | 55a  | 54a  | 53a  | 52a  | 35a  |
|----------------------------------|------|------|------|------|------|------|------|------|------|
| N                                | 1.10 | 0.00 | 0.06 | 0.06 | 0.04 | 0.04 | 0.01 | 0.01 | 0.16 |
| Si                               | 0.06 | 0.03 | 0.07 | 0.06 | 0.06 | 0.04 | 0.09 | 0.09 | 0.10 |
| O                                | 0.04 | 0.05 | 0.15 | 0.32 | 0.32 | 0.31 | 0.30 | 0.29 | 0.10 |
| C <sub><math>\beta</math></sub>  | 0.06 | 0.01 | 0.03 | 0.08 | 0.09 | 0.05 | 0.12 | 0.12 | 0.15 |
| C <sub><math>\alpha</math></sub> | 0.07 | 0.01 | 0.03 | 0.08 | 0.09 | 0.03 | 0.05 | 0.05 | 0.09 |
| O(X)                             | 0.02 | 0.98 | 0.58 | 0.05 | 0.02 | 0.19 | 0.01 | 0.02 | 0.21 |

<sup>a</sup> HF calculations using the 6-311G(d,p) basis set for the CCSD/6-311G(d,p) molecular geometry. Units are electrons; the sum over all atoms is 2.

**Table S7.** Basis set effect on the OVGf first ionization energies (in parentheses) and the HF orbital coefficients in the highest occupied MO's (HOMO,  $HV_2^a$ ) for the 3c-4e XSi←N fragment of molecules XSi(OCH<sub>2</sub>CH<sub>2</sub>)<sub>3</sub>N<sup>a</sup>

|         | atom            | AO                    | 3-21G     | 6-31G(d)  | 6-311G(d,p) |
|---------|-----------------|-----------------------|-----------|-----------|-------------|
| X = F   |                 |                       | (9.56 eV) | (9.48 eV) | (9.81 eV)   |
|         | N               | <i>s</i>              | 0.13      | 0.18      | 0.18        |
|         |                 | <i>p<sub>z</sub></i>  | 0.48      | 0.46      | 0.43        |
|         | Si              | <i>s</i>              | 0.11      | 0.07      | 0.09        |
|         |                 | <i>p<sub>z</sub></i>  | -0.09     | -0.05     | -0.05       |
|         |                 | <i>d<sub>zz</sub></i> | -         | 0.06      | 0.06        |
|         | F               | <i>s</i>              | 0.04      | 0.01      | 0.01        |
|         |                 | <i>p<sub>z</sub></i>  | -0.09     | -0.05     | -0.03       |
| X = OEt |                 |                       | (8.90 eV) | (8.84 eV) | (9.17 eV)   |
|         | N               | <i>s</i>              | 0.12      | 0.19      | 0.19        |
|         |                 | <i>p<sub>z</sub></i>  | 0.45      | 0.48      | 0.45        |
|         | Si              | <i>s</i>              | 0.08      | 0.06      | 0.08        |
|         |                 | <i>p<sub>z</sub></i>  | -0.12     | -0.05     | -0.05       |
|         |                 | <i>d<sub>zz</sub></i> | -         | 0.06      | 0.06        |
|         | O <sub>ax</sub> | <i>s</i>              | -0.01     | 0.00      | 0.00        |
|         |                 | <i>p<sub>z</sub></i>  | -0.17     | -0.07     | -0.05       |

<sup>a</sup> Results at CCSD/6-311G(d,p) geometry. The Z axis is directed along the Si←N bond from N to Si.

**Table S8.** Basis set effect on the HF orbital coefficients in bonding MO's ( $HV_1$ ) for the 3c-4e XSi←N fragment of molecules XSi(OCH<sub>2</sub>CH<sub>2</sub>)<sub>3</sub>N<sup>a</sup>

|         | atom | AO                    | 3-21G | 6-31G(d) | 6-311G(d,p) |
|---------|------|-----------------------|-------|----------|-------------|
| X = F   |      |                       |       |          |             |
|         | N    | <i>s</i>              | -0.09 | -0.06    | -0.07       |
|         |      | <i>p<sub>z</sub></i>  | 0.14  | 0.16     | 0.13        |
|         | Si   | <i>s</i>              | -0.12 | -0.10    | -0.11       |
|         |      | <i>p<sub>z</sub></i>  | -0.10 | -0.14    | -0.09       |
|         |      | <i>d<sub>zz</sub></i> | -     | -0.01    | -0.02       |
|         | F    | <i>s</i>              | 0.11  | 0.10     | 0.09        |
|         |      | <i>p<sub>z</sub></i>  | 0.17  | 0.28     | 0.21        |
| X = EtO |      |                       |       |          |             |
|         | N    | <i>s</i>              | -0.09 | -0.06    | -0.07       |
|         |      | <i>p<sub>z</sub></i>  | 0.14  | 0.15     | 0.11        |
|         | Si   | <i>s</i>              | -0.10 | -0.10    | -0.11       |
|         |      | <i>p<sub>z</sub></i>  | -0.08 | -0.12    | -0.07       |
|         |      | <i>d<sub>zz</sub></i> | -     | -0.01    | 0.00        |
|         | O    | <i>s</i>              | 0.09  | 0.04     | 0.05        |
|         |      | <i>p<sub>z</sub></i>  | 0.13  | 0.19     | 0.14        |

<sup>a</sup> Results at CCSD/6-311G(d,p) geometry. The Z axis is directed along the Si←N bond from N to Si.

**Table S9.** ROVGF/6-311G(d,p) linear vibronic coupling constants,  $\kappa \times 10$  (eV), for ten ionization transitions of F-silatrane evaluated with respect to the totally symmetric normal modes,  $\nu_n$ , frequencies,  $\omega$  ( $\text{cm}^{-1}$ ), and the corresponding vibrational widths,  $\Delta$  (eV)

| $\nu_n$  | $\omega$ | 21a   | 20a   | 15e   | 14e   | 19a   | 13e   | 18a   | 12e   | 17a   | 15a   |
|----------|----------|-------|-------|-------|-------|-------|-------|-------|-------|-------|-------|
| 1        | 85       | 1.20  | -0.44 | 0.00  | -0.12 | -0.41 | 0.04  | 0.71  | -0.69 | -0.10 | 0.15  |
| 4        | 227      | -2.16 | 0.03  | 0.11  | 0.14  | 0.22  | -0.06 | -0.03 | 0.99  | 0.61  | -0.03 |
| 7        | 297      | -0.26 | -0.36 | -0.07 | -0.06 | -0.19 | 0.05  | -0.61 | 0.12  | 0.22  | -0.39 |
| 14       | 475      | 0.81  | -0.18 | -0.14 | -0.12 | -0.03 | -0.19 | -0.22 | 0.30  | 0.16  | 0.06  |
| 15       | 580      | 0.58  | 0.18  | 0.16  | 0.19  | 0.71  | 0.32  | 0.33  | -0.43 | -0.40 | -0.31 |
| 18       | 622      | -0.14 | 0.02  | 0.13  | 0.18  | -0.14 | 0.03  | -0.09 | 0.20  | 0.41  | 0.49  |
| 19       | 763      | 0.11  | -0.25 | -0.23 | -0.15 | -0.24 | -0.28 | 0.41  | -0.27 | -0.04 | -0.66 |
| 22       | 888      | -0.99 | -0.46 | -0.51 | -0.49 | -0.49 | -0.30 | -0.38 | 1.87  | 1.27  | 0.20  |
| 25       | 919      | -0.57 | 0.17  | 0.05  | -0.13 | 0.06  | 0.63  | 0.39  | 0.35  | 0.49  | 0.36  |
| 28       | 1028     | 0.85  | -0.12 | 0.22  | 0.00  | 0.20  | -0.70 | 0.15  | -0.21 | -0.35 | -0.20 |
| 31       | 1097     | 0.59  | -0.08 | 0.14  | 0.18  | 0.56  | -0.33 | -0.70 | -0.10 | 0.26  | 0.04  |
| 34       | 1185     | 0.22  | 0.26  | -0.47 | -0.58 | -0.36 | 0.18  | -0.03 | 1.22  | 1.07  | 0.25  |
| 37       | 1260     | -0.29 | -0.32 | -0.04 | -0.20 | -0.46 | 0.14  | -0.04 | 0.17  | 0.71  | 0.28  |
| 40       | 1291     | -0.50 | -0.05 | 0.21  | 0.16  | 0.67  | 0.14  | -0.53 | 0.26  | -0.19 | 0.61  |
| 45       | 1386     | 0.57  | -0.03 | -0.45 | -0.22 | -0.42 | 0.65  | 0.26  | -0.24 | -0.39 | 0.28  |
| 46       | 1397     | 0.06  | -0.64 | 0.08  | -0.45 | 0.09  | 0.29  | 0.63  | -0.68 | -0.82 | 0.20  |
| 51       | 1488     | -0.59 | 0.01  | 0.17  | -0.09 | -0.12 | 0.13  | 1.23  | 0.20  | 0.07  | 0.50  |
| 54       | 1520     | 0.36  | 0.07  | 0.37  | -0.35 | 0.17  | 0.25  | -0.62 | 0.16  | 0.01  | 0.82  |
| 55       | 3006     | 0.16  | -0.02 | -0.04 | -0.40 | 0.05  | -0.10 | -0.18 | 0.08  | -0.14 | -0.61 |
| 60       | 3030     | -0.06 | -0.13 | -0.09 | 0.02  | -0.10 | 0.18  | 1.12  | -0.04 | -0.14 | 0.15  |
| 63       | 3083     | 0.05  | 0.17  | 0.10  | -0.19 | -0.17 | 0.16  | 0.59  | 0.07  | -0.94 | -0.01 |
| 64       | 3101     | -0.13 | -0.07 | -0.03 | 0.10  | 0.00  | 0.60  | 1.34  | 0.10  | 0.36  | 0.35  |
| $\Delta$ |          | 0.78  | 0.27  | 0.25  | 0.28  | 0.37  | 0.36  | 0.67  | 0.66  | 0.60  | 0.42  |

**Table S10.** ROVGF/6-311G(d,p) linear vibronic coupling constants,  $\kappa \times 10$  (eV), for ten ionization transitions of EtO-silatrane evaluated with respect to the totally symmetric normal modes,  $\nu_n$ , frequencies,  $\omega$  ( $\text{cm}^{-1}$ ), and the corresponding vibrational widths,  $\Delta$  (eV)

| $\nu_n$ | $\omega$ | 59a   | 58a   | 57a   | 56a   | 55a   | 54a   | 53a   | 52a   | 51a   | 35a   |
|---------|----------|-------|-------|-------|-------|-------|-------|-------|-------|-------|-------|
| 1       | 32       | 0.04  | -0.02 | 0.21  | -0.03 | -0.20 | 0.05  | 0.00  | -0.08 | 0.03  | 0.02  |
| 2       | 59       | -0.36 | 0.03  | 0.13  | 0.05  | 0.03  | 0.16  | 0.04  | 0.02  | 0.12  | -0.06 |
| 3       | 79       | 1.04  | -0.48 | 0.19  | -0.09 | -0.12 | -0.36 | 0.07  | -0.01 | -0.36 | 0.16  |
| 4       | 90       | -1.24 | 0.54  | 0.12  | 0.46  | 0.02  | 0.58  | 0.08  | 0.10  | 0.36  | -0.21 |
| 5       | 162      | -0.54 | 0.23  | -0.09 | -0.09 | 0.15  | 0.08  | 0.02  | -0.13 | 0.19  | -0.02 |
| 6       | 167      | 0.37  | -0.08 | 0.01  | 0.07  | -0.05 | -0.16 | -0.01 | 0.06  | -0.12 | 0.02  |
| 7       | 188      | -1.63 | 0.63  | 0.15  | -0.06 | 0.04  | 0.50  | -0.01 | 0.01  | 0.47  | -0.13 |
| 8       | 228      | -0.08 | 0.22  | 0.03  | -0.32 | 0.15  | 0.03  | 0.11  | -0.17 | 0.06  | -0.03 |
| 9       | 246      | 0.25  | -0.02 | -0.34 | -0.27 | 0.09  | 0.13  | 0.00  | -0.15 | -0.07 | 0.00  |
| 10      | 266      | 0.00  | -0.08 | 0.03  | 0.19  | -0.07 | 0.01  | -0.07 | 0.13  | 0.04  | 0.03  |
| 11      | 291      | 0.11  | -0.14 | -0.21 | -0.48 | -0.09 | -0.01 | -0.12 | -0.07 | 0.00  | -0.35 |
| 12      | 311      | 0.01  | 0.03  | -0.09 | 0.10  | 0.02  | -0.11 | -0.06 | 0.02  | -0.18 | 0.08  |
| 13      | 320      | -0.03 | -0.15 | 0.17  | 0.09  | 0.07  | -0.15 | 0.08  | -0.03 | 0.01  | 0.02  |
| 14      | 353      | -1.05 | 0.51  | 0.15  | 0.19  | 0.05  | 0.48  | 0.13  | 0.07  | -0.17 | -0.01 |
| 15      | 377      | 0.00  | -0.06 | 0.44  | -0.74 | 0.39  | 0.02  | 0.11  | -0.17 | -0.04 | -0.02 |
| 16      | 383      | 0.39  | -0.16 | -0.41 | 0.57  | -0.24 | -0.52 | 0.11  | -0.23 | -0.04 | -0.03 |
| 17      | 430      | -0.02 | -0.01 | 0.02  | -0.06 | -0.02 | 0.11  | -0.02 | -0.01 | 0.00  | 0.03  |
| 18      | 432      | -0.06 | 0.03  | 0.20  | -0.28 | 0.01  | 0.11  | -0.07 | 0.11  | -0.03 | 0.01  |
| 19      | 487      | -0.44 | -0.58 | -0.17 | 0.41  | 0.11  | -0.64 | 0.17  | 0.08  | 0.02  | 0.02  |
| 20      | 574      | -0.60 | 0.42  | -0.11 | -0.32 | -0.05 | 0.64  | -0.17 | -0.13 | 0.08  | 0.36  |
| 21      | 592      | -0.08 | 0.06  | -0.07 | -0.09 | 0.04  | 0.23  | -0.07 | 0.10  | 0.15  | 0.09  |
| 22      | 595      | -0.04 | 0.01  | 0.11  | -0.21 | 0.18  | 0.06  | 0.24  | -0.27 | 0.12  | 0.04  |
| 23      | 616      | 0.04  | -0.34 | -0.16 | 0.08  | 0.25  | -0.12 | 0.26  | 0.17  | 0.09  | 0.44  |
| 24      | 754      | -0.24 | 0.47  | 0.20  | 0.18  | 0.09  | 0.16  | 0.06  | 0.13  | 0.45  | 0.64  |
| 25      | 796      | -0.14 | 0.36  | -0.46 | 0.46  | -0.61 | 0.36  | -0.51 | 0.28  | 0.18  | -0.03 |
| 26      | 800      | 0.54  | -0.80 | -0.04 | 0.87  | 0.17  | -0.48 | 0.30  | 0.47  | -0.65 | 0.04  |
| 27      | 815      | -0.01 | -0.07 | 0.15  | 0.10  | 0.01  | -0.19 | 0.04  | -0.09 | 0.06  | 0.00  |
| 28      | 817      | -0.18 | 0.20  | -0.43 | 0.99  | -0.53 | -0.53 | -0.11 | -0.03 | 0.20  | -0.02 |
| 29      | 891      | 0.04  | 0.03  | -0.14 | 0.08  | -0.01 | -0.02 | -0.13 | 0.18  | 0.01  | -0.02 |
| 30      | 894      | 0.05  | -0.02 | 0.20  | -0.83 | 0.43  | 0.18  | 0.02  | 0.01  | -0.03 | -0.01 |
| 31      | 907      | 0.74  | -0.45 | -0.11 | 0.15  | -0.05 | -0.49 | 0.27  | 0.24  | -0.35 | -0.30 |
| 32      | 941      | 0.00  | -0.03 | 0.06  | -0.07 | -0.10 | 0.16  | -0.20 | 0.19  | -0.01 | 0.00  |
| 33      | 941      | -0.01 | 0.05  | 0.01  | -0.84 | 0.85  | -0.19 | 0.05  | 0.01  | -0.03 | 0.02  |
| 34      | 976      | -0.41 | 0.72  | 0.20  | -0.39 | -0.13 | 0.20  | -0.29 | -0.17 | 0.62  | -0.22 |
| 35      | 1019     | -0.77 | -0.03 | -0.10 | -0.06 | -0.13 | 0.14  | 0.04  | -0.01 | 0.08  | 0.17  |
| 36      | 1082     | 0.01  | 0.00  | -0.09 | 0.27  | 0.02  | -0.22 | -0.18 | 0.23  | 0.07  | 0.01  |
| 37      | 1083     | -0.03 | -0.01 | 0.10  | -0.36 | 0.26  | -0.06 | 0.17  | -0.09 | 0.05  | 0.00  |
| 38      | 1094     | 0.65  | -0.03 | 0.09  | -0.16 | 0.22  | 0.19  | 0.07  | -0.10 | -0.02 | 0.09  |
| 39      | 1119     | 0.18  | -0.40 | 0.02  | 0.46  | 0.13  | -0.94 | 0.23  | 0.18  | 0.70  | 0.06  |
| 40      | 1145     | -0.35 | 1.09  | -0.08 | -1.11 | -0.07 | 1.77  | -0.80 | -0.43 | 0.32  | -0.53 |
| 41      | 1151     | 0.06  | -0.12 | -0.26 | 0.84  | -0.80 | 0.05  | -0.32 | 0.55  | -0.26 | 0.08  |
| 42      | 1158     | -0.06 | 0.41  | -0.12 | 0.79  | -0.81 | 0.10  | -0.13 | -0.17 | 0.20  | -0.08 |
| 43      | 1178     | 0.00  | 0.15  | -0.14 | -0.04 | -0.26 | 0.25  | 0.00  | 0.02  | 0.10  | -0.01 |
| 44      | 1190     | 0.28  | 0.24  | 0.16  | 0.35  | -0.41 | -0.42 | -0.42 | -0.30 | 0.38  | 0.46  |
| 45      | 1205     | 0.00  | 0.04  | -0.36 | 0.30  | 0.31  | -0.29 | -0.28 | 0.30  | 0.05  | -0.01 |
| 46      | 1206     | 0.01  | -0.07 | 0.08  | -0.23 | 0.44  | -0.32 | -0.10 | 0.18  | -0.03 | 0.00  |
| 47      | 1261     | 0.31  | -0.02 | 0.06  | 0.36  | -0.02 | -0.16 | 0.22  | 0.28  | -0.02 | -0.32 |
| 48      | 1275     | 0.02  | 0.02  | -0.06 | -0.12 | 0.26  | -0.13 | -0.07 | 0.06  | -0.04 | -0.03 |
| 49      | 1277     | -0.01 | 0.05  | -0.26 | -0.06 | 0.24  | 0.04  | -0.35 | 0.35  | -0.04 | 0.04  |
| 50      | 1290     | 0.39  | -0.13 | -0.10 | 0.04  | -0.24 | -0.29 | -0.11 | -0.04 | -0.10 | -0.56 |
| 51      | 1307     | 0.00  | -0.01 | 0.05  | -0.06 | 0.19  | -0.13 | 0.03  | -0.07 | -0.03 | -0.01 |
| 52      | 1318     | 0.01  | 0.03  | -0.20 | 0.27  | -0.14 | 0.01  | 0.04  | -0.01 | 0.05  | -0.01 |



|          |      |       |       |       |       |       |       |       |       |       |       |
|----------|------|-------|-------|-------|-------|-------|-------|-------|-------|-------|-------|
| 53       | 1319 | 0.01  | 0.07  | -0.03 | -0.40 | 0.32  | 0.09  | 0.11  | -0.13 | -0.04 | 0.01  |
| 54       | 1382 | -0.02 | 0.11  | -0.12 | 0.03  | 0.04  | 0.14  | -0.23 | 0.27  | 0.00  | -0.02 |
| 55       | 1382 | -0.01 | -0.01 | -0.27 | 0.86  | -0.58 | -0.14 | -0.18 | 0.18  | 0.06  | -0.02 |
| 56       | 1387 | 0.55  | 0.14  | -0.12 | -0.12 | -0.32 | 0.04  | -0.12 | -0.15 | -0.52 | 0.29  |
| 57       | 1388 | -0.17 | 0.65  | 0.16  | -0.02 | 0.29  | 0.66  | 0.04  | 0.04  | -1.00 | 0.11  |
| 58       | 1396 | -0.24 | 0.33  | 0.24  | 0.60  | -0.14 | 0.21  | 0.54  | 0.50  | -0.04 | -0.25 |
| 59       | 1408 | 0.01  | -0.03 | 0.08  | 0.31  | -0.58 | 0.17  | 0.19  | -0.19 | -0.15 | -0.01 |
| 60       | 1409 | 0.01  | 0.01  | -0.20 | -0.63 | 0.74  | 0.02  | 0.18  | -0.19 | -0.02 | -0.03 |
| 61       | 1420 | 0.02  | 0.86  | 0.34  | 0.49  | 0.06  | -1.26 | 0.12  | 0.04  | -0.18 | 0.25  |
| 62       | 1475 | 0.00  | -0.02 | 0.02  | -0.01 | 0.13  | -0.10 | 0.01  | -0.02 | 0.05  | 0.00  |
| 63       | 1481 | 0.15  | -0.03 | 0.00  | 0.02  | -0.19 | 0.00  | 0.14  | -0.11 | -0.11 | -0.16 |
| 64       | 1483 | -0.01 | 0.00  | -0.06 | -0.04 | 0.02  | 0.07  | 0.04  | -0.01 | -0.02 | -0.05 |
| 65       | 1486 | 0.64  | -0.09 | -0.05 | -0.12 | -0.18 | -0.12 | 0.08  | 0.10  | -0.05 | -0.43 |
| 66       | 1496 | 0.00  | 0.15  | 0.11  | 0.20  | 0.06  | -0.84 | 0.00  | 0.00  | 2.33  | -0.12 |
| 67       | 1513 | -0.11 | 0.00  | 0.13  | 0.18  | -0.64 | 0.06  | 0.41  | -0.23 | -0.10 | -0.18 |
| 68       | 1515 | 0.22  | 0.05  | 0.09  | -0.60 | 0.64  | 0.54  | 0.01  | -0.46 | 0.10  | 0.50  |
| 69       | 1517 | -0.27 | -0.07 | -0.05 | -0.60 | 0.06  | -0.17 | 0.44  | 0.22  | -0.08 | -0.62 |
| 70       | 1521 | 0.03  | -0.32 | 0.14  | -0.10 | -0.18 | 1.25  | 0.02  | 0.04  | 0.03  | 0.40  |
| 71       | 3000 | -0.03 | -0.16 | 0.29  | -0.09 | -0.17 | -0.12 | 0.42  | 0.00  | -0.26 | 0.11  |
| 72       | 3000 | -0.01 | -0.20 | -0.02 | 0.43  | -0.44 | -0.29 | 0.19  | 0.17  | -0.47 | 0.07  |
| 73       | 3001 | -0.05 | 0.24  | -0.06 | 0.03  | 0.20  | 0.22  | 0.27  | 0.06  | 0.51  | 0.27  |
| 74       | 3002 | -0.07 | 0.03  | 0.01  | 0.03  | 0.20  | -0.19 | 0.11  | 0.58  | 0.04  | 0.35  |
| 75       | 3007 | -0.01 | -0.03 | 0.19  | -0.29 | 0.05  | 0.07  | 0.16  | -0.21 | -0.01 | 0.01  |
| 76       | 3008 | -0.02 | -0.01 | 0.06  | -0.01 | -0.16 | 0.09  | 0.28  | -0.25 | -0.01 | 0.00  |
| 77       | 3013 | 0.15  | 0.13  | 0.09  | 0.05  | 0.13  | 0.30  | -0.16 | -0.28 | 0.10  | -0.26 |
| 78       | 3036 | 0.00  | 0.13  | -0.04 | 0.03  | -0.36 | 0.25  | -0.03 | 0.03  | 0.13  | -0.01 |
| 79       | 3039 | -0.05 | -0.12 | 0.01  | 0.03  | -0.04 | -0.30 | -0.06 | -0.05 | 0.56  | 0.02  |
| 80       | 3076 | -0.01 | -0.04 | 0.01  | 0.04  | -0.35 | 0.30  | -0.17 | 0.12  | -0.08 | -0.05 |
| 81       | 3076 | -0.04 | -0.09 | -0.18 | -0.06 | -0.03 | 0.04  | 0.03  | 0.08  | 0.04  | 0.04  |
| 82       | 3079 | 0.03  | 0.08  | -0.03 | 0.59  | -0.29 | -0.01 | -0.23 | 0.06  | 0.06  | -0.05 |
| 83       | 3094 | -0.14 | -0.02 | -0.04 | -0.20 | -0.02 | 0.09  | 0.11  | 0.08  | 0.04  | 0.28  |
| 84       | 3099 | 0.02  | 0.02  | -0.02 | 0.02  | 0.02  | -0.06 | -0.01 | 0.04  | 0.02  | -0.04 |
| 85       | 3100 | 0.00  | -0.01 | 0.06  | -0.13 | 0.05  | 0.06  | -0.07 | 0.05  | 0.00  | 0.02  |
| 86       | 3115 | 0.02  | -0.06 | -0.02 | 0.03  | 0.03  | 0.04  | 0.01  | 0.02  | 2.07  | -0.04 |
| 87       | 3124 | 0.00  | 0.02  | -0.04 | 0.01  | 0.02  | 0.00  | 0.00  | 0.01  | -0.12 | 0.00  |
| $\Delta$ |      | 0.79  | 0.62  | 0.37  | 0.84  | 0.64  | 0.86  | 0.45  | 0.43  | 0.91  | 0.45  |
